# Supplementary material
Source: MDPI journal article supplement (https://www.mdpi.com/2075-163X/12/8/1033)
Supplement: s1 [file s1]

---

# Vermiculite Modified with Fe<sup>3+</sup> Polyhydroxy Cations Is a Low-Cost and Highly Available Adsorbent for the Removal of Phosphate Ions

Fernando H. do Nascimento <sup>1</sup> and Jorge C. Masini <sup>1,\*</sup>

Departamento de Química Fundamental, Instituto de Química, Universidade de São Paulo, Av. Prof. Lineu Prestes 748, São Paulo 05508-000, SP, Brazil

\* Correspondence: jcmasini@iq.usp.br; Tel.: +55-11-3091-1469

**Table S1.** Effect of mass of FeOH-Vt on the adsorption of Phosphate from a 15.0 mg·L<sup>-1</sup> (in P) after 200 min of contact time under stirring. Temperature = 25.0 ± 0.5°C.

| Mass (mg) | Mean Mass (mg) | Initial P (mg·L <sup>-1</sup> ) | Final P (mg·L <sup>-1</sup> ) | Removed P (mg·L <sup>-1</sup> ) | Adsorbed P (mg) | q (mg·g <sup>-1</sup> ) | Mean q (mg·g <sup>-1</sup> ) | SD <sup>a</sup> on q | Adsorption % | Mean % | SD on Adsorption % |
|-----------|----------------|---------------------------------|-------------------------------|---------------------------------|-----------------|-------------------------|------------------------------|----------------------|--------------|--------|--------------------|
| 25.6      | 25.3           | 15.0                            | 13.02                         | 1.98                            | 0.0198          | 0.774                   | 0.836                        | 0.073                | 13.21        | 14.06  | 1.1                |
| 25.2      |                | 15.0                            | 12.93                         | 2.06                            | 0.0206          | 0.818                   |                              |                      | 13.74        |        |                    |
| 25.0      |                | 15.0                            | 12.71                         | 2.29                            | 0.0229          | 0.917                   |                              |                      | 15.29        |        |                    |
| 50.7      | 50.4           | 15.0                            | 9.54                          | 5.46                            | 0.0546          | 1.078                   | 1.021                        | 0.056                | 36.43        | 34.32  | 2.0                |
| 50.3      |                | 15.0                            | 10.14                         | 4.86                            | 0.0486          | 0.966                   |                              |                      | 32.38        |        |                    |
| 50.2      |                | 15.0                            | 9.88                          | 5.12                            | 0.0512          | 1.020                   |                              |                      | 34.15        |        |                    |
| 75.3      | 75.2           | 15.0                            | 6.35                          | 8.65                            | 0.0865          | 1.149                   | 1.124                        | 0.045                | 57.67        | 56.36  | 2.1                |
| 75.4      |                | 15.0                            | 6.92                          | 8.08                            | 0.0808          | 1.072                   |                              |                      | 53.86        |        |                    |
| 75.0      |                | 15.0                            | 6.37                          | 8.63                            | 0.0863          | 1.151                   |                              |                      | 57.53        |        |                    |
| 100.0     | 100.2          | 15.0                            | 3.68                          | 11.32                           | 0.1132          | 1.132                   | 0.981                        | 0.075                | 75.47        | 68.84  | 6.7                |
| 100.1     |                | 15.0                            | 4.65                          | 10.35                           | 0.1035          | 1.034                   |                              |                      | 68.98        |        |                    |
| 100.4     |                | 15.0                            | 5.69                          | 9.31                            | 0.0931          | 0.928                   |                              |                      | 62.08        |        |                    |

<sup>a</sup> Standard deviation

**Table S2.** Adsorption kinetics data obtained in a dispersion of 2.0 g of FeOH-Vt in 200 mL of an initial  $4.84 \times 10^2 \mu\text{mol L}^{-1}$  phosphate solution ( $15.0 \text{ mg}\cdot\text{L}^{-1}$  in P).

| Time (min) | q ( $\text{mg}\cdot\text{g}^{-1}$ ) | q ( $\mu\text{mol}\cdot\text{g}^{-1}$ ) | Adsorption % |
|------------|-------------------------------------|-----------------------------------------|--------------|
| 5          | 0.165                               | 5.327                                   | 21.2         |
| 10         | 0.242                               | 7.798                                   | 26.3         |
| 20         | 0.339                               | 10.935                                  | 32.8         |
| 40         | 0.483                               | 15.581                                  | 42.5         |
| 80         | 0.727                               | 23.483                                  | 58.9         |
| 120        | 0.914                               | 29.505                                  | 71.4         |
| 160        | 1.032                               | 33.293                                  | 79.2         |
| 200        | 1.138                               | 36.726                                  | 86.4         |
| 240        | 1.182                               | 38.161                                  | 89.3         |
| 280        | 1.221                               | 39.405                                  | 91.9         |
| 320        | 1.248                               | 40.307                                  | 93.8         |
| 360        | 1.246                               | 40.233                                  | 93.6         |

**Table S3.** Data of adsorption isotherms ( $25.0 \pm 0.5 \text{ }^\circ\text{C}$ ) in dispersions of 100 mg of FeOH-Vt in 10 mL phosphate solution with initial concentrations between 1.0 and  $250.0 \text{ mg}\cdot\text{L}^{-1}$  in P.

| Initial P conc.<br>( $\text{mg}\cdot\text{L}^{-1}$ ) | Final P conc.<br>( $\text{mg}\cdot\text{L}^{-1}$ ) | q ( $\text{mg}\cdot\text{g}^{-1}$ ) | Adsorption % |
|------------------------------------------------------|----------------------------------------------------|-------------------------------------|--------------|
| 1.0                                                  | <LOD                                               | 0.097                               | >99          |
| 5.0                                                  | 0.814                                              | 0.406                               | 83           |
| 10.0                                                 | 3.399                                              | 0.659                               | 69           |
| 25.0                                                 | 12.57                                              | 1.168                               | 49           |
| 50.0                                                 | 31.97                                              | 1.762                               | 35           |
| 100.0                                                | 75.47                                              | 2.488                               | 24.9         |
| 200.0                                                | 161.0                                              | 3.877                               | 19.5         |
| 250.0                                                | 210.6                                              | 4.313                               | 15.8         |
